# Supplementary material for: Blue light insertion at night is involved in sleep and arousal-promoting response delays and depressive-like emotion in mice
Source: PubMed Central journal article supplement (PMC7938454; doi:10.1042/bsr20204033), 2021-03-04
Supplement: BSR-2020-4033_supp.pdf [file BSR-2020-4033_supp.pdf]

**A.**

**White light**

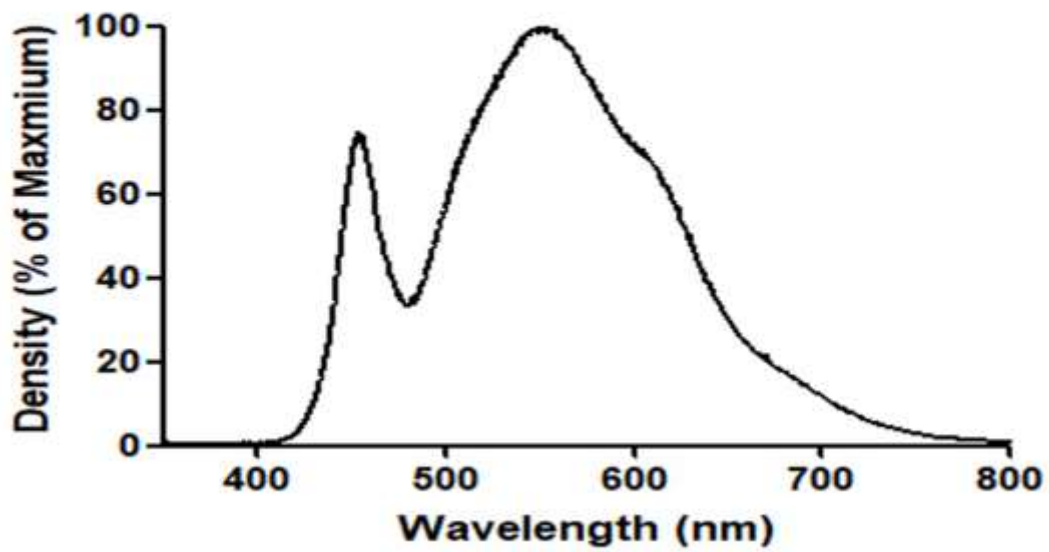

**B.**

**Blue light**

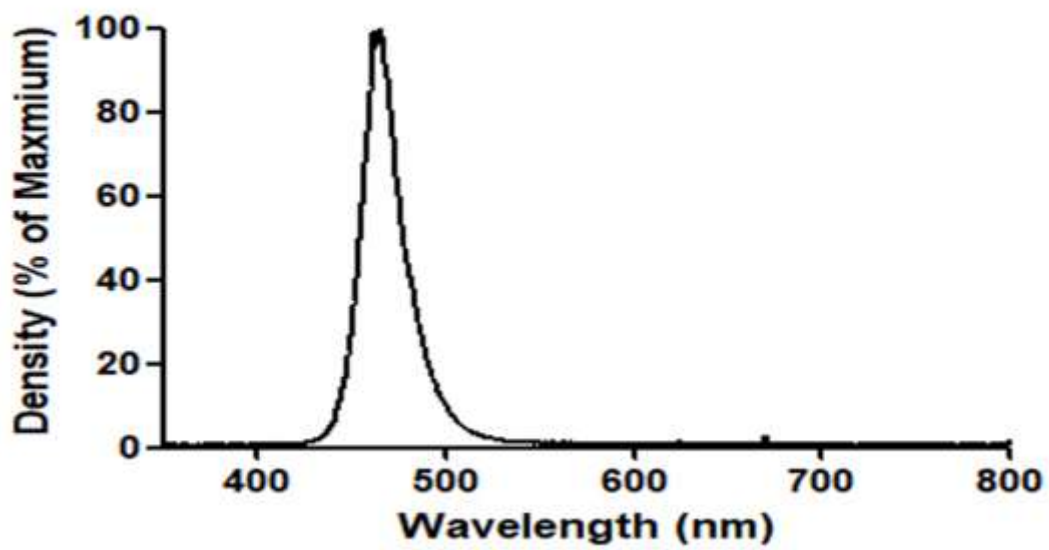

**Supplementary Figure S1.** The wavelength spectrum of white light and blue light. The range of wavelength shown is from 350 nm to 800 nm. The y axis presented the light density at distinct wavelength, showing as the percent of the maximum.
